# Supplementary material
Source: Springer Nature journal article supplement (https://www.springermedizin.de/resource/supplementary/12936_2012_2639_MOESM1_ESM.pdf/9544906)

Supplementary Figure 1:

Representative isobolograms of in vitro interactions of thapsigargin with OZ277 or semi-synthetic artemisinins against *Plasmodium falciparum* NF54

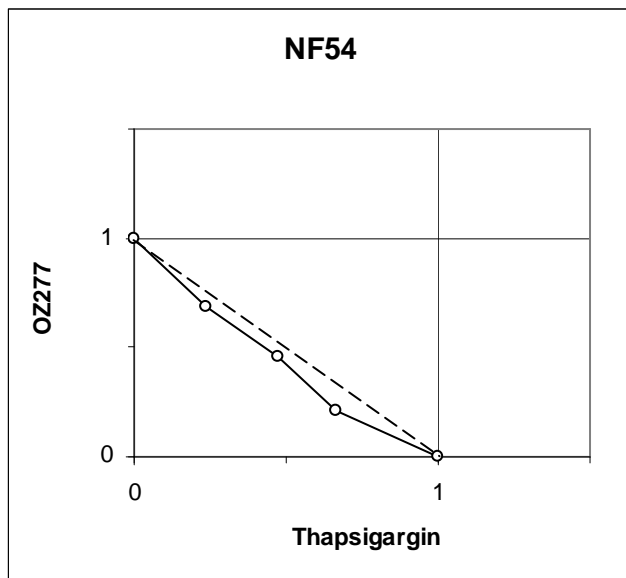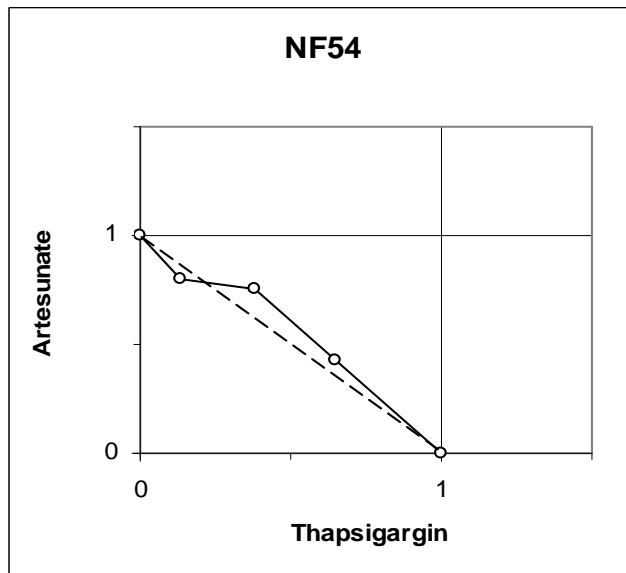

# NF54

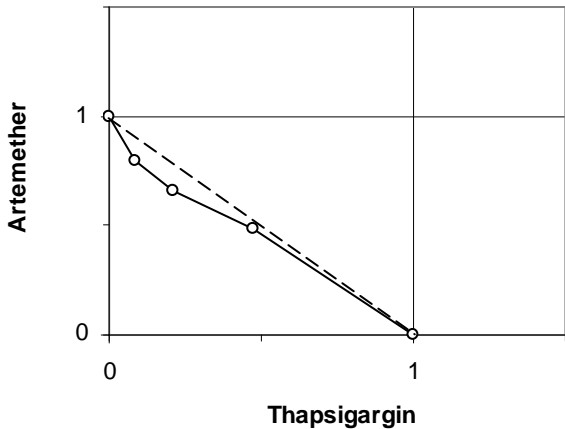

Supplement: MOESM1 [file 9544906]
